# Supplementary material
Source: MDPI journal article supplement (https://www.mdpi.com/2079-6412/11/7/850)
Supplement: s1 [file s1]

# Supplementary Materials: Removal of As(V) Based on Amino-Group Surface-Functionalized Porous Silicon Derived from Photovoltaic Silicon Cutting Powder

Kaixin Fu <sup>1</sup>, Yi Li <sup>1</sup>, Xiumin Chen <sup>2</sup>, Wenhui Ma <sup>2</sup>, Ziheng Yang <sup>1</sup>, Tong Wang <sup>2</sup>, Jiasen Liu <sup>1</sup>, Zhuang Ma <sup>1</sup>, Ran Chen <sup>3</sup>, Xiuhua Chen <sup>1,4,\*</sup> and Shaoyuan Li <sup>2,\*</sup>

- <sup>1</sup> School of Materials and Energy, Yunnan University, Kunming 650091, China; fkaixin@mail.ynu.edu.cn (K.F.); innovator777@126.com (Y.L.); 18213057158@163.com (Z.Y.); liujasen@163.com (J.L.); 15827016731@163.com (Z.M.)
- <sup>2</sup> Faculty of Metallurgical and Energy Engineering/State Key Laboratory of Complex Nonferrous Metal Resources Clean Utilization, Kunming University of Science and Technology, Kunming 650093, China; chenxiumin9@outlook.com (X.C.); mwhsilicom@126.com (W.M.); wtsilicon@msn.cn (T.W.)
- <sup>3</sup> Australian Centre for Advanced Photovoltaics, School of Photovoltaic and Renewable Energy Engineering, University of New South Wales, Sydney 2052, Australia; ran.chen@unsw.edu.au
- <sup>4</sup> Nature Center for International Research on Photoelectric and Energy Materials, Yunnan University, Kunming 650091, China
- \* Correspondence: chenxh@ynu.edu.cn (X.C.); lsy415808550@163.com (S.L.)

**Citation:** Fu, K.; Li, Y.; Chen, X.; Ma, W.; Yang, Z.; Wang, T.; Liu, J.; Ma, Z.; Chen, R.; Chen, X.; et al. Removal of As(V) Based on Amino Group Surface-Functionalized Porous Silicon Derived from Photovoltaic Silicon Cutting Powder. *Coatings* **2021**, *11*, 850. <https://doi.org/10.3390/coatings11070850>

Academic Editor:  
Tadeusz Hryniewicz

Received: 16 June 2021  
Accepted: 9 July 2021  
Published: 15 July 2021

**Publisher's Note:** MDPI stays neutral with regard to jurisdictional claims in published maps and institutional affiliations.

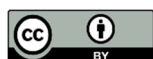

**Copyright:** © 2021 by the authors. Submitted for possible open access publication under the terms and conditions of the Creative Commons Attribution (CC BY) license (<http://creativecommons.org/licenses/by/4.0/>).

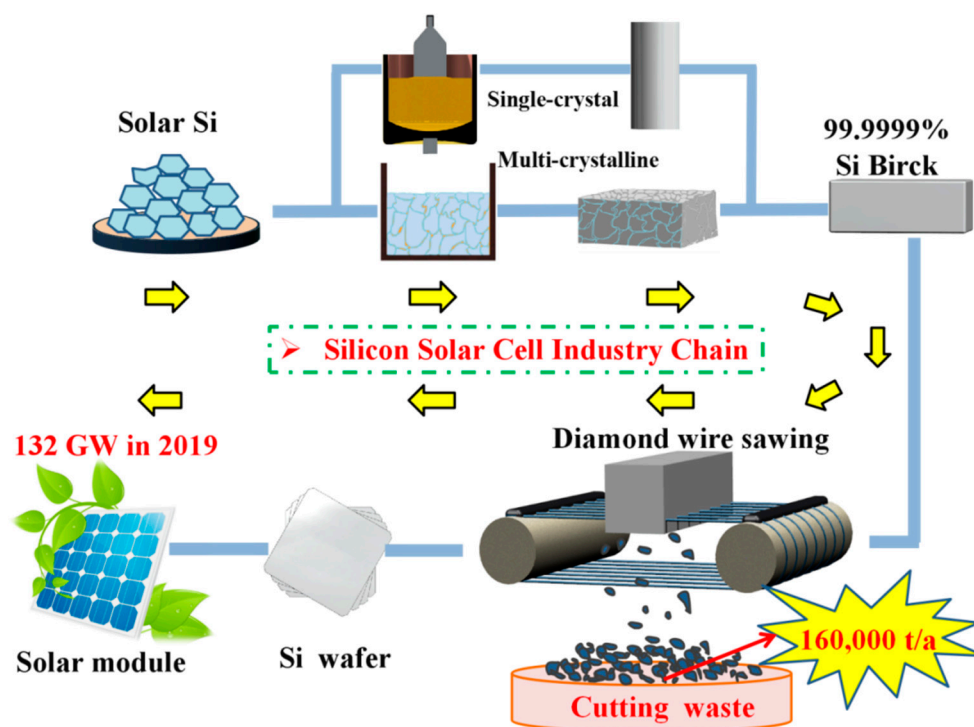

**Figure S1.** Silicon solar cell industry chain form solar grade silicon to solar module.
